# Supplementary material for: PRAME expression in fibrosarcomatous dermatofibrosarcoma protuberans
Source: Research Square preprint supplement (doi:10.21203/rs.3.rs-4275491/v1), 2024-04-29
Supplement: Supplementary file 1 [file 65b0e656d42c06b8d2aba6e6.xlsx]

## Sheet: Table 1
				Table 1. Clinical characteristics
						FS-DFSP	C-DFSP
				Clinical information		N=21	N=21
				Age
				Mean ± SD		43.4 ± 13.5	42.4 ± 12.3
				Median (range)		44 (6-66)	40 (18-65)
				Sex (male/female)		13/8	12/9
				Location
				Head-face-neck		1	1
				Trunk		16	16
				Upper extremity		1	2
				Lower extremity		2	2
				Viscera		1	0
				Metastasis		1	0
				Recurrence		2	1
